# Supplementary material
Source: PubMed Central journal article supplement (PMC5292826)
Supplement: NIHMS762631-supplement-Supplemental_Figure_1A_and_1B_pdf.pdf [file NIHMS762631-supplement-Supplemental_Figure_1A_and_1B_pdf.pdf]

# Supplemental Figure

**1A. Receiver operating characteristic (ROC) of Culture Positive vs. Culture Negative Specimens and Groups I and IV.**

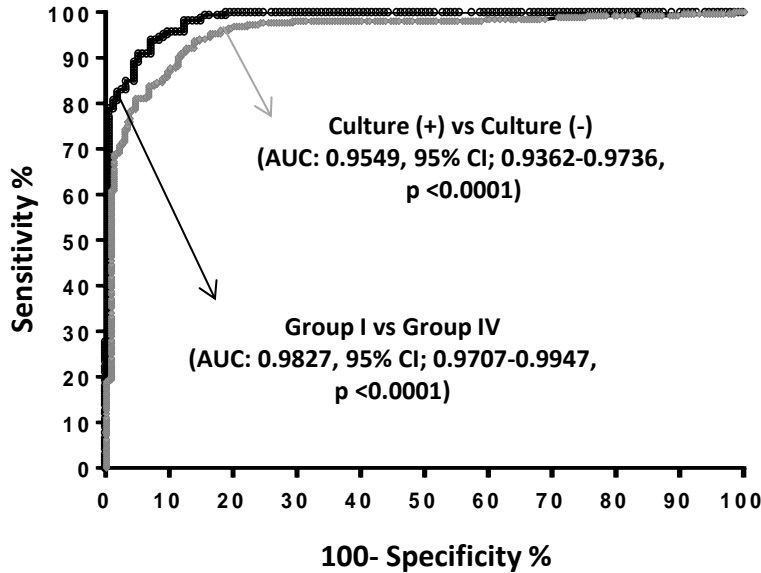

| HAdV Ct  | Culture (+) vs Culture (-) |     |     |     | Group I vs Group IV |     |     |     |
|----------|----------------------------|-----|-----|-----|---------------------|-----|-----|-----|
|          | Sen                        | Spe | PPV | NPV | Sen                 | Spe | PPV | NPV |
| Ct of 33 | 91                         | 88  | 89  | 89  | 95                  | 91  | 91  | 95  |
| Ct of 34 | 94                         | 85  | 87  | 93  | 95                  | 87  | 87  | 95  |
| Ct of 35 | 97                         | 77  | 82  | 96  | 99                  | 79  | 82  | 99  |
| Ct of 36 | 98                         | 69  | 78  | 97  | 99                  | 70  | 76  | 99  |
| Ct of 37 | 98                         | 56  | 71  | 96  | 99                  | 55  | 67  | 99  |

**1B. ROC of Species B and C in Culture Positive vs. Culture Negative Specimens**

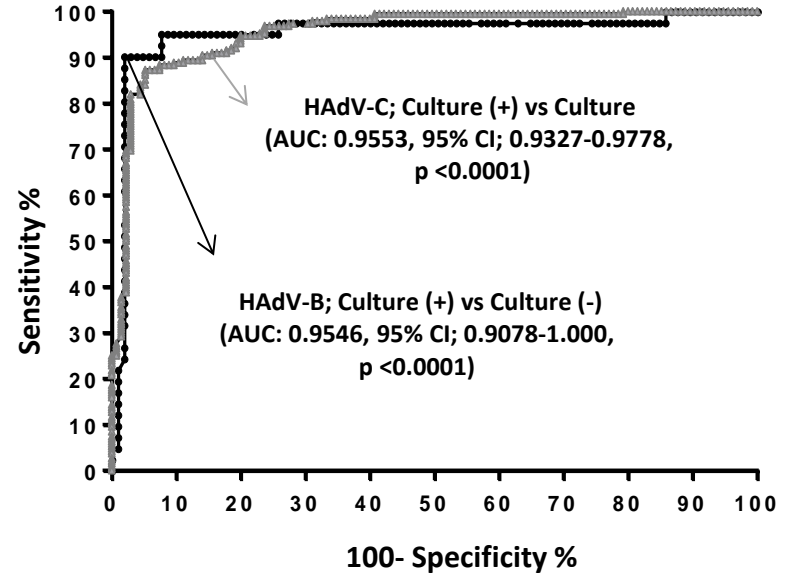

| HAdV Ct  | HAdV-C; Culture (+) vs Culture (-) |     |     |     | HAdV-B; Culture (+) vs Culture (-) |     |     |     |
|----------|------------------------------------|-----|-----|-----|------------------------------------|-----|-----|-----|
|          | Sen                                | Spe | PPV | NPV | Sen                                | Spe | PPV | NPV |
| Ct of 33 | 90                                 | 89  | 85  | 92  | 93                                 | 92  | 97  | 83  |
| Ct of 34 | 95                                 | 85  | 82  | 96  | 94                                 | 90  | 96  | 86  |
| Ct of 35 | 97                                 | 76  | 74  | 97  | 98                                 | 90  | 96  | 93  |
| Ct of 36 | 98                                 | 68  | 69  | 98  | 98                                 | 90  | 95  | 95  |
| Ct of 37 | 98                                 | 54  | 61  | 97  | 98                                 | 90  | 94  | 97  |

Abbreviation

CI, confidential interval; AUC, area under the curve; Sen, sensitivity; Spe, specificity; PPV, positive predictive value; NPV, negative predictive value
